# Supplementary material
Source: PubMed Central journal article supplement (PMC10721715)
Supplement: NIHMS1913514-supplement-Supplemental_Material.pdf [file NIHMS1913514-supplement-Supplemental_Material.pdf]

**Supplementary Table 1:**

*Spearman's Rho Correlations between ordinal predictors in logistic regression*

|                             | 1    | 2     | 3     | 4    |
|-----------------------------|------|-------|-------|------|
| 1. Provider Training Status | -    |       |       |      |
| 2. Gender                   | .02  | -     |       |      |
| 3. Race                     | .01  | -.01  | -     |      |
| 4. Ethnicity                | .01  | .00   | .18** | -    |
| 5. Trauma Type              | .08* | .17** | .04   | -.01 |

*\*p < .05; \*\*p < .01*
